# Supplementary material for: Cost Offsets of Treatment for Serious Mental Illness and Substance Use Disorder
Source: Atypon-hosted journal article supplement (doi:10.1176/appi.ps.201900445), 2021-05-11
Supplement: appi.ps.201900445.ds001.pdf [file appi.ps.201900445.ds001.pdf]

## APPENDIX

### Engagement in Treatment

We developed a definition of *engaged* in treatment to capture individuals who experienced a significant period of treatment following the index event (Figure A1). We stratified the populations with serious mental illness (or substance use disorder) into engaged in treatment and comparison groups. To qualify as engaged in treatment, we required at least five separate days of *outpatient treatment* in the 180 days following the index event, with at least one day of treatment falling in the first 30 days after an outpatient index event or in the first 60 days following an inpatient index event. To define an outpatient encounter, we used the Healthcare Effectiveness Data and Information Set (HEDIS) Adult Core Value Set, specifically the definition found in the Initiation and Engagement of Alcohol and Other Drug Abuse or Dependence Treatment, Follow-Up After Hospitalization for Mental Illness, Detoxification, Behavioral Health Outpatient, and Anthem Psychotherapy and Residential Treatment Opioid Use Disorder codes. *Outpatient treatment* was defined as a subset of *outpatient encounters*, which excluded urgent care or medication management (see Appendix Table A18). We required a follow-up visit to occur approximately six months following enrollees' first treatment visit to ensure continuity of care. Operationally, this meant we required at least one day of outpatient treatment to fall between 151 to 210 days following the index event.

**FIGURE A1. Definition of *Engaged* and *Not Engaged* in Treatment**

**Engaged:**

Requirements if outpatient visit (OV) triggers the episode:

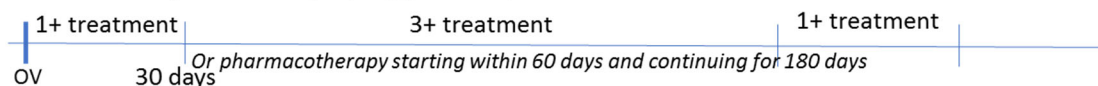

Requirements if inpatient visit (IV) triggers the episode:

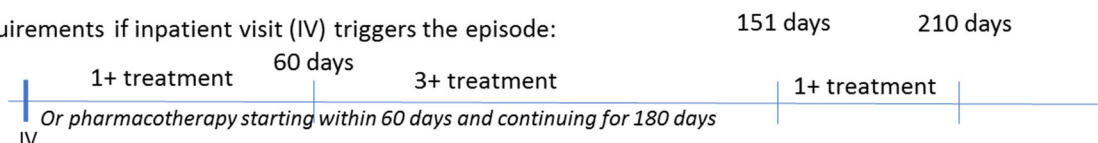

**Not engaged:**

Episode is triggered but does not meet criteria for engaged:

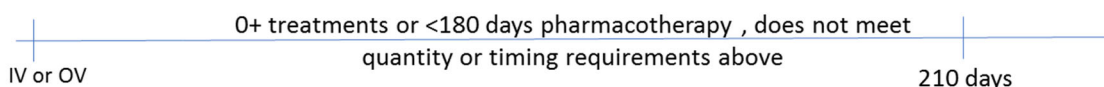

Pharmacotherapy treatment was another way to be engaged in treatment. An initial pharmacotherapy fill must have occurred within the first 60 days following the index event as described above. A seven-day gap between prescription fills was allowed, from the date of the initial fill through the entire 180-day follow-up period. Requiring that treatment occur across a span of time helps ensure that the definition of *engaged* in treatment captures a commitment to treatment that occurs over a significant period and not short-term periodic treatment. An individual who engaged in treatment via either outpatient treatment or pharmacotherapy was included in the treated population, whereas any individual who had a qualifying index event but fell short of both the outpatient treatment and pharmacotherapy requirements was included in the comparison group.

**Propensity Score Analysis**

The Toolkit for Weighting and Analysis of Nonequivalent Groups (TWANG) R package was used to account and control for potential confounding due to selection bias. The generalized boosted regression model is a data adaptive and nonparametric modeling technique; it automatically selects covariates and interaction terms to reach the optimal iteration that best balances treatment and comparison groups on baseline characteristics. This approach has been used previously in other analyses of substance use disorder treatment interventions (1,2).

The propensity score weights were calculated to balance baseline measures, including demographic characteristics such as age, sex, race/ethnicity (for Medicaid sample only); type of insurance; employee classification (for commercial sample only); year of index event; location (census region for commercial sample and state for Medicaid sample); utilization and health care spending 12 months before the index event; and general medical comorbidities. We used the standard effect size measure to assess the quality of propensity score weights (i.e., the balance achieved between groups on baseline measures), see Appendix Tables A2–A9. For all comparisons, we minimized differences between groups in pretreatment characteristics; no such measures differed by a standardized effect size of more than 0.2, which is a conventional threshold in propensity score analysis (3).

Spending and cost offsets were examined by setting (inpatient, outpatient, and emergency department), by service type (behavioral health treatment, other behavioral health treatment [any claim with a behavioral health diagnosis not included in treatment], and other health treatment), and by each of the three years of follow-up. For each combination of setting and service type, we estimated a propensity score weighted multivariate model to allow for doubly robust estimates (4). Models controlled for the same variables as used in the propensity matching. We then estimated the average treatment effect based on the assumption that the untreated population had an equal chance of being engaged in treatment.

Details about the Internal Classification of Diseases, Ninth and Tenth Revision code list used to identify serious mental illness, substance use disorders, chronic obstructive pulmonary disorder, chronic pain, diabetes, cardiovascular diseases, or hepatitis C, or about how drugs for pharmacotherapy were defined, are available from the authors upon request.

## Study Population

We included enrollees who were aged 18 to 64 years during the study period whose insurer contributed medical, prescription drug, and behavioral health services claims to the MarketScan Databases. We excluded enrollees with any capitated claims because we were not certain that claims for all services provided were submitted. We also excluded enrollees who were dually eligible for Medicare and Medicaid because we did not have their Medicare claims. We defined separate study populations for enrollees with commercial insurance and those with Medicaid because differential reimbursement rates by payer may affect whether there is a cost offset. Finally, we required a minimum of four years of continuous enrollment to enable each subject to have a one-year clean period and three years of follow-up. Only three states contributing to the MarketScan Multi-State Medicaid Database met our inclusion criteria and thus were included in the study

**TABLE A1. Attrition table**

| Step                                                                     | Serious mental illness |             | Substance use disorder |             |
|--------------------------------------------------------------------------|------------------------|-------------|------------------------|-------------|
|                                                                          | Medicaid               | Commercial  | Medicaid               | Commercial  |
| Starting population                                                      | 23,861,190             | 125,142,161 | 23,861,190             | 125,142,161 |
| Has at least 24 months of continuous enrollment                          | 12,907,322             | 56,752,726  | 12,907,322             | 56,752,726  |
| Aged 18–64 years during study                                            | 5,860,535              | 44,816,646  | 5,860,535              | 44,816,646  |
| Had drug coverage                                                        | 4,855,932              | 37,717,224  | 4,855,932              | 37,717,224  |
| Had behavioral health coverage                                           | 4,726,304              | 31,883,837  | 4,726,304              | 31,883,837  |
| Was not dually eligible                                                  | 4,331,918              | N/A         | 4,331,918              | N/A         |
| Non-negative claims                                                      | 4,331,844              | 31,882,280  | 4,331,844              | 31,882,280  |
| No capitated services                                                    | 1,643,345              | 31,865,844  | 1,643,345              | 31,865,844  |
| Has at least 1 SMI (or SUD) qualifying encounter during CE               | 130,746                | 840,019     | 67,440                 | 343,957     |
| SMI (or SUD) Index Diagnosis Event (with 12-month clean period)          | 14,281                 | 163,345     | 11,849                 | 107,408     |
| Have 36 months CE following index Dx and received SMI (or SUD) treatment | 1,108                  | 11,030      | 497                    | 4,331       |

Abbreviations: CE, continuous enrollment; Dx, diagnosis; N/A, not applicable; SMI, serious mental illness; SUD, substance use disorder.

Source: Authors' analysis of data from the IBM MarketScan Commercial and Multi-State Medicaid Databases.

**FIGURE A2. Adjusted combined inpatient and emergency department spending by year and engagement type for Medicaid and commercial population<sup>a,b</sup>**

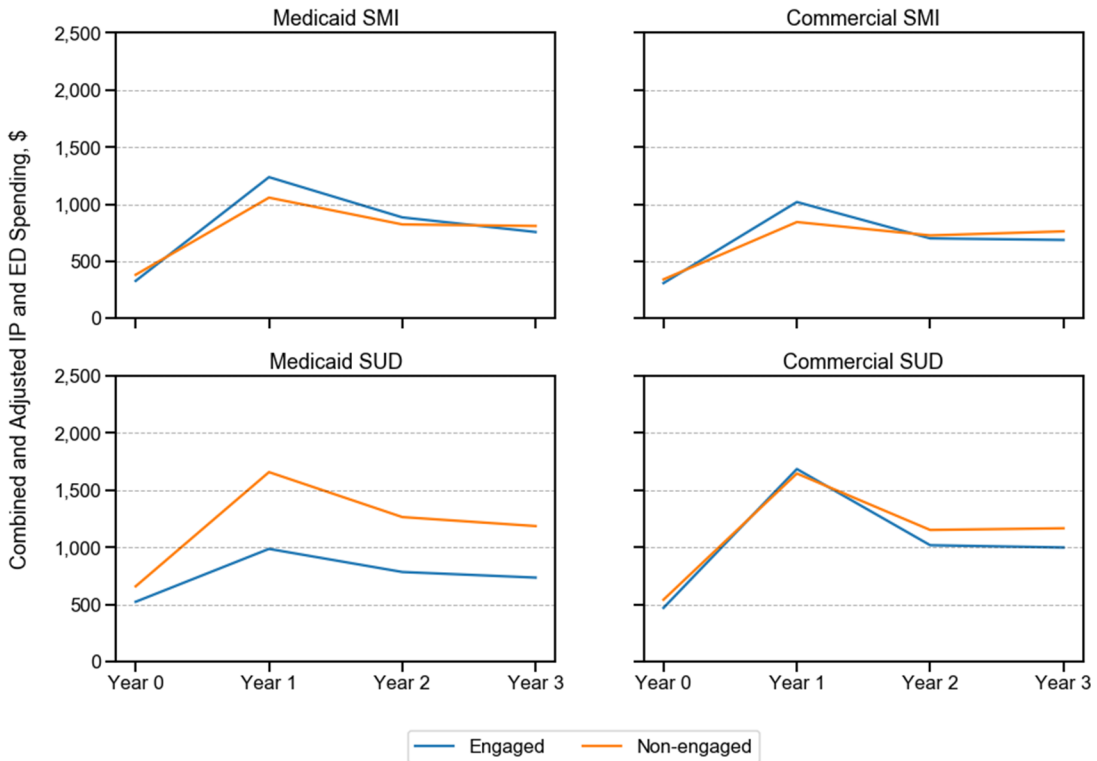

<sup>a</sup> IP, inpatient; OP, outpatient; SMI, serious mental illness; SUD, substance use disorder.

<sup>b</sup> Source is authors' analysis of data from the IBM MarketScan Databases. All spending was adjusted to 2017 levels using the Medical Care Consumer Price Index. Significance testing was not calculated for the setting totals but was for all health care costs.

**FIGURE A3. Adjusted outpatient spending by year and engagement type for Medicaid and commercial populations<sup>a,b</sup>**

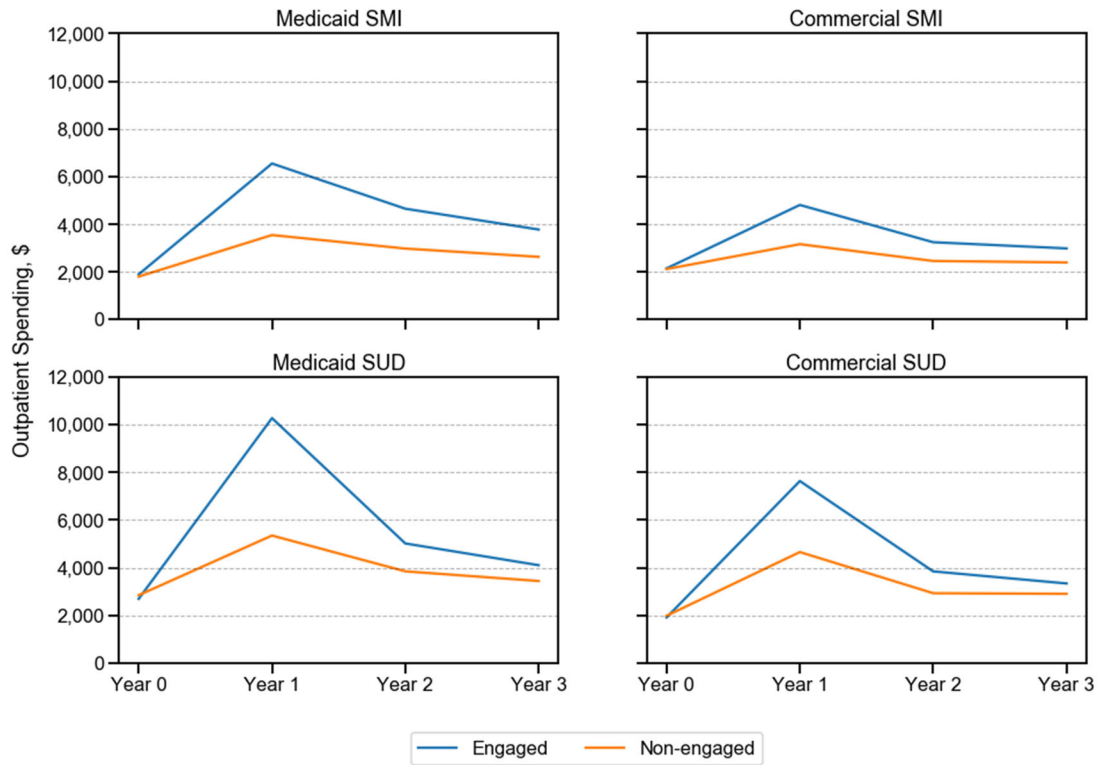

<sup>a</sup> SMI, serious mental illness; SUD, substance use disorder.

<sup>b</sup> Source is authors' analysis of data from the IBM MarketScan Databases. All spending was adjusted to 2017 levels using the Medical Care Consumer Price Index. Significance testing was not calculated for the setting totals but was for all health care costs.

**FIGURE A4. All health care costs by year for adults aged 44 -64 with a substance use disorder enrolled in commercial insurance<sup>a,b</sup>**

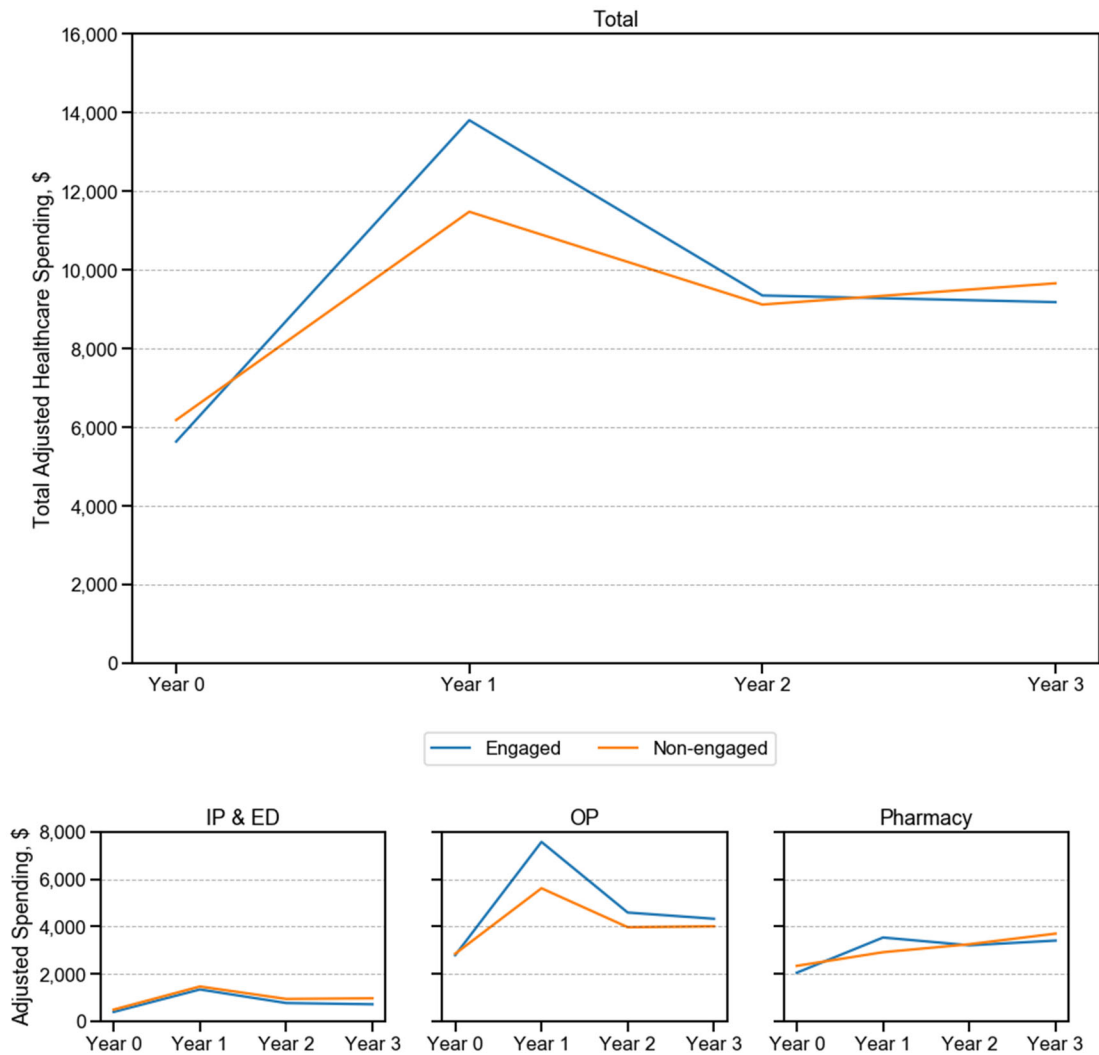

<sup>a</sup> IP, inpatient; OP, outpatient.

<sup>b</sup> Source is authors' analysis of data from the IBM MarketScan Databases. All spending was adjusted to 2017 levels using the Medical Care Consumer Price Index. Significance testing was not calculated for the setting totals but was for all health care costs. Total health care expenditures is not significantly different for all 3 study years.

**TABLE A2. Propensity matching, before and after, Medicaid substance use disorder**

| Characteristic                                                            | Before weighting            |                                   |                  |         | After weighting             |                                   |                  |         |
|---------------------------------------------------------------------------|-----------------------------|-----------------------------------|------------------|---------|-----------------------------|-----------------------------------|------------------|---------|
|                                                                           | Engaged<br>(n=442),<br>mean | Not engaged<br>(n=1,873),<br>mean | Std. diff.,<br>% | P value | Engaged<br>(n=395),<br>mean | Not engaged<br>(n=1,859),<br>mean | Std. diff.,<br>% | P value |
| Age, continuous                                                           |                             |                                   |                  |         |                             |                                   |                  |         |
| 18–64 years                                                               | 35.4                        | 37.3                              | –14.0            | 0.008   | 36.4                        | 37.0                              | –4.4             | 0.425   |
| Sex of patient                                                            |                             |                                   |                  | 0.557   |                             |                                   |                  | 0.474   |
| Female                                                                    | 48.6                        | 47.1                              | 3.1              |         | 49.2                        | 47.3                              | 4.0              |         |
| Male                                                                      | 51.4                        | 52.9                              | –3.1             |         | 50.8                        | 52.7                              | –4.0             |         |
| Race, %                                                                   |                             |                                   |                  | 0.169   |                             |                                   |                  | 0.286   |
| White                                                                     | 60.4                        | 56.8                              | 7.4              |         | 60.3                        | 57.4                              | 6.0              |         |
| Black                                                                     | 39.6                        | 43.2                              | –7.4             |         | 39.7                        | 42.6                              | –6.0             |         |
| Year of index diagnosis, %                                                |                             |                                   |                  | 0.368   |                             |                                   |                  | 0.619   |
| 2011                                                                      | 48.2                        | 52.7                              | –9.1             |         | 55.3                        | 51.8                              | 7.1              |         |
| 2012                                                                      | 19.0                        | 16.8                              | 5.6              |         | 15.7                        | 17.2                              | –4.3             |         |
| 2013                                                                      | 18.3                        | 16.6                              | 4.4              |         | 16.0                        | 16.9                              | –2.5             |         |
| 2014                                                                      | 14.5                        | 13.8                              | 1.9              |         | 13.0                        | 14.0                              | –3.1             |         |
| Co-occurring disorders during 1-<br>year clean period, % with<br>disorder |                             |                                   |                  |         |                             |                                   |                  |         |
| Diabetes                                                                  | 5.0                         | 5.9                               | –4.1             | 0.465   | 5.3                         | 5.7                               | –1.6             | 0.782   |
| Serious mental illness                                                    | 19.9                        | 20.9                              | –2.6             | 0.635   | 20.5                        | 20.7                              | –0.4             | 0.945   |
| Other medical information during<br>1-year clean period                   |                             |                                   |                  |         |                             |                                   |                  |         |
| With at least 1 inpatient stay, %                                         | 9.7                         | 12.7                              | –10.1            | 0.085   | 9.7                         | 12.4                              | –9.0             | 0.140   |
| With at least 1 emergency<br>department visit, %                          | 49.8                        | 57.3                              | –15.0            | 0.004   | 53.6                        | 56.3                              | –5.4             | 0.330   |
| Charlson Comorbidity Index                                                | 0.61                        | 0.65                              | –2.7             | 0.610   | 0.64                        | 0.64                              | 0.1              | 0.990   |
| Psychiatric Diagnosis Groups                                              | 1.24                        | 1.37                              | –8.4             | 0.100   | 1.32                        | 1.34                              | –1.5             | 0.785   |
| All-health spending, \$ 2017                                              | 9,566                       | 10,793                            | –5.5             | 0.249   | 9,998                       | 10,596                            | –2.9             | 0.545   |

Abbreviations: Std. diff., standardized difference.

Note: All spending was adjusted to 2017 levels using the Medical Care Consumer Price Index.

Source: Authors' analysis of data from the IBM MarketScan Multi-State Medicaid Database.



**TABLE A3. Propensity matching, before and after, Medicaid serious mental illness**

| Characteristic                                                     | Before weighting      |                             |               |         | After weighting       |                              |               |         |
|--------------------------------------------------------------------|-----------------------|-----------------------------|---------------|---------|-----------------------|------------------------------|---------------|---------|
|                                                                    | Engaged (n=923), mean | Not engaged (n=2,074), mean | Std. diff., % | P value | Engaged (n=849), mean | Not engaged (n= 2,035), mean | Std. diff., % | P value |
| Age, continuous                                                    |                       |                             |               |         |                       |                              |               |         |
| 18–64 years                                                        | 33.92                 | 31.28                       | 19.9          | <.0001  | 32.05                 | 31.97                        | 0.6           | 0.879   |
| Sex of patient, %                                                  |                       |                             |               | 0.077   |                       |                              |               | 0.346   |
| Female                                                             | 62.0                  | 58.5                        | 7.1           |         | 61.1                  | 59.3                         | 3.9           |         |
| Male                                                               | 38.0                  | 41.5                        | –7.1          |         | 38.9                  | 40.7                         | –3.9          |         |
| Race, %                                                            |                       |                             |               | 0.001   |                       |                              |               | 0.425   |
| White                                                              | 56.8                  | 50.4                        | 12.8          |         | 53.8                  | 52.2                         | 3.3           |         |
| Black                                                              | 43.2                  | 49.6                        | –12.8         |         | 46.2                  | 47.8                         | –3.3          |         |
| Year of index diagnosis, %                                         |                       |                             |               | 0.024   |                       |                              |               | 0.725   |
| 2011                                                               | 43.3                  | 47.9                        | –9.3          |         | 47.4                  | 46.8                         | 1.3           |         |
| 2012                                                               | 17.4                  | 18.6                        | –3.0          |         | 16.7                  | 18.4                         | –4.5          |         |
| 2013                                                               | 23.9                  | 20.0                        | 9.3           |         | 21.7                  | 20.8                         | 2.3           |         |
| 2014                                                               | 15.3                  | 13.5                        | 4.8           |         | 14.2                  | 14.0                         | 0.3           |         |
| Co-occurring disorders during 1-year clean period, % with disorder |                       |                             |               |         |                       |                              |               |         |
| Diabetes                                                           | 4.9                   | 3.9                         | 4.7           | 0.198   | 3.7                   | 3.9                          | –0.7          | 0.851   |
| Substance use disorder                                             | 5.6                   | 8.3                         | –11.5         | 0.011   | 6.3                   | 7.6                          | –5.3          | 0.250   |
| Other medical information during 1-year clean period               |                       |                             |               |         |                       |                              |               |         |
| With at least 1 inpatient stay, %                                  | 6.2                   | 8.2                         | –8.6          | 0.049   | 6.5                   | 7.7                          | –4.9          | 0.267   |
| With at least 1 emergency department visit, %                      | 45.6                  | 49.9                        | –8.5          | 0.032   | 47.3                  | 48.8                         | –2.9          | 0.474   |
| Charlson Comorbidity Index                                         | 0.41                  | 0.37                        | 4.2           | 0.301   | 0.35                  | 0.37                         | –2.3          | 0.535   |
| Psychiatric Diagnosis Groups                                       | 0.85                  | 0.92                        | –6.8          | 0.080   | 0.89                  | 0.89                         | –0.2          | 0.959   |
| All-health spending, \$ 2017                                       | 5,538                 | 6,159                       | –3.9          | 0.321   | 5,581                 | 5,857                        | –1.8          | 0.661   |

Abbreviations: Std. diff., standardized difference.

Note: All spending was adjusted to 2017 levels using the Medical Care Consumer Price Index.

Source: Authors' analysis of data from the IBM MarketScan Multi-State Medicaid Database.

**TABLE A4. Propensity matching, before and after, commercial substance use disorder**

| Characteristic                                                        | Before weighting              |                                    |                  |            | After weighting               |                                    |                  |            |
|-----------------------------------------------------------------------|-------------------------------|------------------------------------|------------------|------------|-------------------------------|------------------------------------|------------------|------------|
|                                                                       | Engaged<br>(n=4,314),<br>mean | Not engaged<br>(n=24,105),<br>mean | Std.<br>diff., % | P<br>value | Engaged<br>(n=4,132),<br>mean | Not engaged<br>(n=24,072),<br>mean | Std.<br>diff., % | P<br>value |
| Age, continuous                                                       |                               |                                    |                  |            |                               |                                    |                  |            |
| 18–64 years                                                           | 34.94                         | 34.94                              | 0.0              | 0.993      | 34.87                         | 34.94                              | –0.4             | 0.807      |
| Sex of patient, %                                                     |                               |                                    |                  | 0.014      |                               |                                    |                  | 0.468      |
| Female                                                                | 28.5                          | 30.4                               | –4.1             |            | 29.6                          | 30.2                               | –1.2             |            |
| Male                                                                  | 71.5                          | 69.6                               | 4.1              |            | 70.4                          | 69.8                               | 1.2              |            |
| Plan type, %                                                          |                               |                                    |                  | <.0001     |                               |                                    |                  | 0.657      |
| CD/HD                                                                 | 17.0                          | 19.4                               | –6.3             |            | 18.5                          | 19.1                               | –1.4             |            |
| HMO/POS/EPO                                                           | 13.6                          | 14.6                               | –2.9             |            | 14.3                          | 14.5                               | –0.5             |            |
| PPO/comprehensive                                                     | 69.4                          | 66.0                               | 7.3              |            | 67.2                          | 66.5                               | 1.5              |            |
| Year of index diagnosis, %                                            |                               |                                    |                  | 0.002      |                               |                                    |                  | 0.907      |
| 2011                                                                  | 26.1                          | 28.7                               | –5.9             |            | 27.9                          | 28.4                               | –1.0             |            |
| 2012                                                                  | 28.3                          | 26.8                               | 3.3              |            | 27.4                          | 27.1                               | 0.7              |            |
| 2013                                                                  | 25.2                          | 23.8                               | 3.3              |            | 24.3                          | 24.0                               | 0.7              |            |
| 2014                                                                  | 20.3                          | 20.6                               | –0.8             |            | 20.5                          | 20.6                               | –0.3             |            |
| Co-occurring disorders during 1-year<br>clean period, % with disorder |                               |                                    |                  |            |                               |                                    |                  |            |
| Diabetes                                                              | 2.0                           | 2.4                                | –2.6             | 0.148      | 2.1                           | 2.3                                | –1.6             | 0.379      |
| Serious mental illness                                                | 5.7                           | 5.8                                | –0.7             | 0.678      | 5.7                           | 5.8                                | –0.6             | 0.742      |
| Other medical information during 1-year<br>clean period               |                               |                                    |                  |            |                               |                                    |                  |            |
| With at least 1 inpatient stay, %                                     | 4.9                           | 6.0                                | –5.1             | 0.005      | 5.3                           | 5.9                                | –2.7             | 0.142      |
| With at least 1 emergency department<br>visit, %                      | 25.8                          | 28.0                               | –5.1             | 0.003      | 27.1                          | 27.8                               | –1.4             | 0.403      |
| Charlson Comorbidity Index                                            | 0.21                          | 0.24                               | –3.9             | 0.012      | 0.22                          | 0.23                               | –2.5             | 0.130      |
| Psychiatric Diagnosis Groups                                          | 0.62                          | 0.61                               | 0.1              | 0.939      | 0.61                          | 0.61                               | –0.7             | 0.665      |
| All-health spending, \$ 2017                                          | 6,067                         | 6,626                              | –2.7             | 0.055      | 5,973                         | 6,530                              | –3.0             | 0.037      |

Abbreviations: CD/HD, consumer-driven/high-deductible; EPO, exclusive provider organization; HMO, health maintenance organization; POS, point of service; PPO, preferred provider organization; Std. diff., standardized difference.

Note: All spending was adjusted to 2017 levels using the Medical Care Consumer Price Index.

Source: Authors' analysis of data from the IBM MarketScan Commercial Databases.

**TABLE A5. Propensity matching, before and after, commercial serious mental illness**

| Characteristic                                                           | Before weighting               |                                    |                  |            | After weighting                |                                    |                  |            |
|--------------------------------------------------------------------------|--------------------------------|------------------------------------|------------------|------------|--------------------------------|------------------------------------|------------------|------------|
|                                                                          | Engaged<br>(n=10,999),<br>mean | Not engaged<br>(n=24,806),<br>mean | Std.<br>diff., % | P<br>value | Engaged<br>(n=10,852),<br>mean | Not engaged<br>(n=24,736),<br>mean | Std.<br>diff., % | P<br>value |
| Age, continuous                                                          |                                |                                    |                  |            |                                |                                    |                  |            |
| 18–64 years                                                              | 32.97                          | 32.94                              | 0.2              | 0.853      | 32.88                          | 32.95                              | –0.5             | 0.647      |
| Sex of patient, %                                                        |                                |                                    |                  | 0.005      |                                |                                    |                  | 0.569      |
| Female                                                                   | 58.3                           | 56.8                               | 3.2              |            | 57.5                           | 57.1                               | 0.7              |            |
| Male                                                                     | 41.7                           | 43.2                               | –3.2             |            | 42.5                           | 42.9                               | –0.7             |            |
| Plan type, %                                                             |                                |                                    |                  | 0.009      |                                |                                    |                  | 0.635      |
| CD/HD                                                                    | 19.9                           | 18.8                               | 2.9              |            | 19.4                           | 19.1                               | 0.9              |            |
| HMO/POS/EPO                                                              | 14.7                           | 15.6                               | –2.6             |            | 15.1                           | 15.4                               | –0.8             |            |
| PPO/comprehensive                                                        | 65.4                           | 65.6                               | –0.5             |            | 65.5                           | 65.5                               | –0.1             |            |
| Year of index diagnosis, %                                               |                                |                                    |                  | 0.009      |                                |                                    |                  | 0.904      |
| 2011                                                                     | 28.0                           | 27.1                               | 1.9              |            | 27.5                           | 27.4                               | 0.2              |            |
| 2012                                                                     | 26.9                           | 28.5                               | –3.5             |            | 27.7                           | 28.1                               | –0.8             |            |
| 2013                                                                     | 25.3                           | 25.4                               | –0.3             |            | 25.4                           | 25.4                               | 0.1              |            |
| 2014                                                                     | 19.8                           | 19.0                               | 2.1              |            | 19.4                           | 19.2                               | 0.6              |            |
| Co-occurring disorders during<br>1-year clean period, % with<br>disorder |                                |                                    |                  |            |                                |                                    |                  |            |
| Diabetes                                                                 | 2.8                            | 2.9                                | –0.4             | 0.709      | 2.8                            | 2.8                                | –0.2             | 0.857      |
| SUD                                                                      | 2.6                            | 3.4                                | –4.9             | <.0001     | 3.0                            | 3.2                                | –1.3             | 0.297      |
| Other medical information<br>during 1-year clean period                  |                                |                                    |                  |            |                                |                                    |                  |            |
| With at least 1 inpatient<br>stay, %                                     | 6.2                            | 7.0                                | –3.5             | 0.004      | 6.3                            | 6.7                                | –1.7             | 0.159      |
| With at least 1 emergency<br>department visit, %                         | 30.1                           | 31.7                               | –3.5             | 0.003      | 30.8                           | 31.3                               | –1.1             | 0.356      |
| Charlson Comorbidity Index                                               | 0.22                           | 0.24                               | –2.8             | 0.011      | 0.22                           | 0.24                               | –2.0             | 0.084      |
| Psychiatric Diagnosis Groups                                             | 0.84                           | 0.82                               | 1.9              | 0.101      | 0.82                           | 0.82                               | –0.7             | 0.562      |
| All health spending, \$ 2017                                             | 6,285                          | 6,258                              | 0.1              | 0.907      | 6,041                          | 6,223                              | –0.9             | 0.435      |

Abbreviations: CD/HD, consumer-driven/high-deductible; EPO, exclusive provider organization; HMO, health maintenance organization; POS, point of service; PPO, preferred provider organization; Std. diff., standardized difference; SUD, substance use disorder.

Note: All spending was adjusted to 2017 levels using the Medical Care Consumer Price Index.

Source: Authors' analysis of data from the IBM MarketScan Commercial Database.

**TABLE A6. Propensity matching, before and after, Medicaid opioid use disorder subpopulation**

| Characteristic                                                     | Before weighting     |                           |               |         | After weighting       |                           |            |         |
|--------------------------------------------------------------------|----------------------|---------------------------|---------------|---------|-----------------------|---------------------------|------------|---------|
|                                                                    | Engaged (n=91), mean | Not engaged (n=196), mean | Std. diff., % | P value | Engaged (n= 75), mean | Not engaged (n=190), mean | Std. Diff. | P value |
| Age, continuous                                                    |                      |                           |               |         |                       |                           |            |         |
| 18–64 years                                                        | 37.28                | 37.95                     | –5.9          | 0.635   | 37.32                 | 37.82                     | –4.5       | 0.736   |
| Sex of patient, %                                                  |                      |                           |               | 0.589   |                       |                           |            | 0.414   |
| Female                                                             | 72.5                 | 69.4                      | 7.0           |         | 75.2                  | 70.4                      | 11.1       |         |
| Male                                                               | 27.5                 | 30.6                      | –7.0          |         | 24.8                  | 29.6                      | –11.1      |         |
| Race, %                                                            |                      |                           |               | 0.020   |                       |                           |            | 0.336   |
| White                                                              | 69.2                 | 81.6                      | –26.9         |         | 74.2                  | 79.5                      | –12.1      |         |
| Black                                                              | 30.8                 | 18.4                      | 26.9          |         | 25.8                  | 20.5                      | 12.1       |         |
| Year of index diagnosis, %                                         |                      |                           |               | 0.154   |                       |                           |            | 0.947   |
| 2011                                                               | 39.6                 | 53.6                      | –28.7         |         | 47.8                  | 51.5                      | –7.5       |         |
| 2012                                                               | 15.4                 | 13.3                      | 5.9           |         | 14.5                  | 13.7                      | 2.2        |         |
| 2013                                                               | 29.7                 | 20.4                      | 20.3          |         | 24.7                  | 22.0                      | 6.3        |         |
| 2014                                                               | 15.4                 | 12.8                      | 7.3           |         | 12.9                  | 12.7                      | 0.6        |         |
| Co-occurring disorders during 1-year clean period, % with disorder |                      |                           |               |         |                       |                           |            |         |
| Diabetes                                                           | 2.2                  | 6.1                       | –26.8         | 0.153   | 2.1                   | 5.3                       | –22.9      | 0.193   |
| Serious mental illness                                             | 14.3                 | 15.8                      | –4.4          | 0.738   | 15.9                  | 15.0                      | 2.5        | 0.851   |
| Other medical information during 1-year clean period               |                      |                           |               |         |                       |                           |            |         |
| With at least 1 inpatient stay, %                                  | 9.9                  | 14.3                      | –14.7         | 0.303   | 10.0                  | 12.6                      | –8.7       | 0.549   |
| With at least 1 emergency department visit, %                      | 50.5                 | 58.2                      | –15.2         | 0.229   | 55.8                  | 55.8                      | 0.1        | 0.996   |
| Charlson Comorbidity Index                                         | 0.341                | 0.536                     | –19.7         | 0.079   | 0.415                 | 0.495                     | –8.5       | 0.510   |
| Psychiatric Diagnosis Groups                                       | 1.121                | 1.403                     | –18.8         | 0.127   | 1.242                 | 1.320                     | –5.2       | 0.704   |
| All-health spending, \$ 2017                                       | 7,196                | 11,708                    | –20.2         | 0.072   | 11,045                | 10,707                    | 1.4        | 0.929   |

Abbreviations: Std. diff., standardized difference.

Note: All spending was adjusted to 2017 levels using the Medical Care Consumer Price Index.

Source: Authors' analysis of data from the IBM MarketScan Multi-State Medicaid Database.

**TABLE A7. Propensity matching, before and after, commercial opioid use disorder subpopulation**

| Characteristic                                                     | Before weighting      |                             |               |         | After weighting       |                             |               |         |
|--------------------------------------------------------------------|-----------------------|-----------------------------|---------------|---------|-----------------------|-----------------------------|---------------|---------|
|                                                                    | Engaged (n=993), mean | Not engaged (n=3,011), mean | Std. diff., % | P value | Engaged (n=967), mean | Not engaged (n=3,001), mean | Std. diff., % | P value |
| Age, continuous                                                    |                       |                             |               |         |                       |                             |               |         |
| 18–64 years                                                        | 32.60                 | 32.67                       | –0.5          | 0.881   | 32.30                 | 32.65                       | –2.7          | 0.473   |
| Sex of patient, %                                                  |                       |                             |               | 0.005   |                       |                             |               | 0.136   |
| Female                                                             | 31.3                  | 36.2                        | –10.6         |         | 32.8                  | 35.4                        | –5.6          |         |
| Male                                                               | 68.7                  | 63.8                        | 10.6          |         | 67.2                  | 64.6                        | 5.6           |         |
| Plan type, %                                                       |                       |                             |               | 0.488   |                       |                             |               | 0.538   |
| CD/HD                                                              | 16.8                  | 18.5                        | –4.4          |         | 16.9                  | 18.4                        | –4.2          |         |
| HMO/POS/EPO                                                        | 15.3                  | 14.7                        | 1.7           |         | 15.2                  | 14.7                        | 1.4           |         |
| PPO/comprehensive                                                  | 67.9                  | 66.9                        | 2.2           |         | 67.9                  | 66.8                        | 2.3           |         |
| Year of index diagnosis, %                                         |                       |                             |               | 0.487   |                       |                             |               | 0.699   |
| 2011                                                               | 27.0                  | 27.7                        | –1.6          |         | 28.0                  | 27.5                        | 1.2           |         |
| 2012                                                               | 29.5                  | 27.0                        | 5.6           |         | 28.8                  | 27.3                        | 3.4           |         |
| 2013                                                               | 24.2                  | 25.2                        | –2.4          |         | 23.8                  | 25.2                        | –3.3          |         |
| 2014                                                               | 19.3                  | 20.1                        | –2.0          |         | 19.4                  | 20.1                        | –1.7          |         |
| Co-occurring disorders during 1-year clean period, % with disorder |                       |                             |               |         |                       |                             |               |         |
| Diabetes                                                           | 1.7                   | 2.6                         | –6.5          | 0.127   | 1.9                   | 2.4                         | –3.6          | 0.400   |
| Serious mental illness                                             | 6.1                   | 6.6                         | –1.9          | 0.605   | 6.4                   | 6.5                         | –0.6          | 0.878   |
| Other medical information during 1-year clean period               |                       |                             |               |         |                       |                             |               |         |
| With at least 1 inpatient stay, %                                  | 6.7                   | 7.9                         | –4.6          | 0.233   | 7.4                   | 7.5                         | –0.3          | 0.928   |
| With at least 1 emergency department visit, %                      | 30.5                  | 33.0                        | –5.4          | 0.150   | 31.5                  | 32.5                        | –2.2          | 0.550   |
| Charlson Comorbidity Index                                         | 0.18                  | 0.25                        | –10.3         | 0.001   | 0.20                  | 0.24                        | –6.8          | 0.059   |
| Psychiatric Diagnosis Groups                                       | 0.65                  | 0.68                        | –3.7          | 0.309   | 0.65                  | 0.67                        | –2.0          | 0.588   |
| All health spending, \$ 2017                                       | 7,464                 | 9,595                       | –8.4          | 0.012   | 8,233                 | 9,143                       | –3.7          | 0.336   |

Abbreviations: CD/HD, consumer-driven/high-deductible; EPO, exclusive provider organization; HMO, health maintenance organization; POS, point of service; PPO, preferred provider organization; Std. diff., standardized difference.

Note: All spending was adjusted to 2017 levels using the Medical Care Consumer Price Index.

Source: Authors' analysis of data from the IBM MarketScan Commercial Database.

**TABLE A8. Propensity matching, before and after, Medicaid subpopulation, adults 44 – 64 years with a substance use disorder**

| Characteristic                                                     | Before weighting      |                           |               |         | After weighting       |                            |               |         |
|--------------------------------------------------------------------|-----------------------|---------------------------|---------------|---------|-----------------------|----------------------------|---------------|---------|
|                                                                    | Engaged (n=144), mean | Not engaged (n=710), mean | Std. diff., % | P value | Engaged (n=124), mean | Not engaged (n= 704), mean | Std. diff., % | P value |
| Age, continuous                                                    |                       |                           |               |         |                       |                            |               |         |
| 18–64 years                                                        | 52.10                 | 52.18                     | –1.7          | 0.857   | 51.86                 | 52.15                      | –6.6          | 0.475   |
| Sex of patient, %                                                  |                       |                           |               | 0.134   |                       |                            |               | 0.701   |
| Female                                                             | 41.7                  | 35.1                      | 13.4          |         | 37.3                  | 35.6                       | 3.6           |         |
| Male                                                               | 58.3                  | 64.9                      | –13.4         |         | 62.7                  | 64.4                       | –3.6          |         |
| Race, %                                                            |                       |                           |               | 0.361   |                       |                            |               | 0.720   |
| White                                                              | 46.5                  | 50.7                      | –8.4          |         | 48.9                  | 50.6                       | –3.5          |         |
| Black                                                              | 53.5                  | 49.3                      | 8.4           |         | 51.1                  | 49.4                       | 3.5           |         |
| Year of index diagnosis, %                                         |                       |                           |               | 0.931   |                       |                            |               | 0.678   |
| 2011                                                               | 47.2                  | 45.4                      | 3.7           |         | 50.4                  | 45.3                       | 10.3          |         |
| 2012                                                               | 17.4                  | 18.5                      | –2.9          |         | 14.6                  | 18.3                       | –10.4         |         |
| 2013                                                               | 17.4                  | 19.2                      | –4.7          |         | 18.2                  | 19.1                       | –2.4          |         |
| 2014                                                               | 18.1                  | 17.0                      | 2.6           |         | 16.7                  | 17.2                       | –1.4          |         |
| Co-occurring disorders during 1-year clean period, % with disorder |                       |                           |               |         |                       |                            |               |         |
| Diabetes                                                           | 10.4                  | 11.8                      | –4.6          | 0.629   | 11.6                  | 11.6                       | 0.2           | 0.986   |
| Substance use disorder                                             | 19.4                  | 23.2                      | –9.6          | 0.321   | 20.0                  | 23.1                       | –7.8          | 0.443   |
| Other medical information during 1-year clean period               |                       |                           |               |         |                       |                            |               |         |
| With at least 1 inpatient stay, %                                  | 11.1                  | 14.5                      | –10.8         | 0.284   | 12.0                  | 14.0                       | –6.4          | 0.548   |
| With at least 1 emergency department visit, %                      | 54.2                  | 56.9                      | –5.5          | 0.547   | 55.1                  | 56.4                       | –2.6          | 0.789   |
| Charlson Comorbidity Index                                         | 1.097                 | 1.151                     | –3.0          | 0.760   | 1.049                 | 1.140                      | –5.1          | 0.580   |
| Psychiatric Diagnosis Groups                                       | 1.299                 | 1.375                     | –5.0          | 0.567   | 1.352                 | 1.364                      | –0.8          | 0.930   |
| All health spending, \$ 2017                                       | \$10,560              | \$13,510                  | –10.8         | 0.084   | \$11,765              | \$13,209                   | –6.0          | 0.448   |

Abbreviations: Std. diff., standardized difference.

Note: All spending was adjusted to 2017 levels using the Medical Care Consumer Price Index.

Source: Authors' analysis of data from the IBM MarketScan Multi-State Medicaid Database.

**TABLE A9. Propensity matching, before and after, commercial subpopulation, adults 44 – 64 years with a substance use disorder**

| Characteristic                                                     | Before weighting        |                             |               |         | After weighting           |                               |               |         |
|--------------------------------------------------------------------|-------------------------|-----------------------------|---------------|---------|---------------------------|-------------------------------|---------------|---------|
|                                                                    | Engaged (n=1,336), mean | Not engaged (n=8,007), mean | Std. diff., % | P value | Engaged (n=1,304.6), mean | Not engaged (n=8,001.3), mean | Std. diff., % | P value |
| Age, continuous                                                    |                         |                             |               |         |                           |                               |               |         |
| 18–64 years                                                        | 52.67                   | 52.96                       | –6.1          | 0.038   | 52.87                     | 52.92                         | –1.0          | 0.731   |
| Sex of patient, %                                                  |                         |                             |               | .098    |                           |                               |               | 0.408   |
| Female                                                             | 32.4                    | 34.7                        | –5.0          |         | 33.4                      | 34.6                          | –2.5          |         |
| Male                                                               | 67.6                    | 65.3                        | 5.0           |         | 66.6                      | 65.4                          | 2.5           |         |
| Plan type, %                                                       |                         |                             |               | 0.403   |                           |                               |               | 0.478   |
| CD/HD                                                              | 15.5                    | 16.9                        | –3.8          |         | 15.6                      | 16.8                          | –3.4          |         |
| HMO/POS/EPO                                                        | 15.3                    | 14.5                        | 2.1           |         | 15.3                      | 14.5                          | 2.1           |         |
| PPO/comprehensive                                                  | 69.2                    | 68.6                        | 1.3           |         | 69.1                      | 68.7                          | 1.0           |         |
| Year of index diagnosis, %                                         |                         |                             |               | .574    |                           |                               |               | 0.757   |
| 2011                                                               | 27.9                    | 29.7                        | –4.0          |         | 28.5                      | 29.6                          | –2.5          |         |
| 2012                                                               | 26.4                    | 25.8                        | 1.3           |         | 26.0                      | 25.9                          | 0.4           |         |
| 2013                                                               | 24.9                    | 23.7                        | 2.6           |         | 25.0                      | 23.8                          | 2.7           |         |
| 2014                                                               | 20.8                    | 20.7                        | 0.3           |         | 20.5                      | 20.7                          | –0.5          |         |
| Co-occurring disorders during 1-year clean period, % with disorder |                         |                             |               |         |                           |                               |               |         |
| Diabetes                                                           | 4.9                     | 5.4                         | –2.6          | 0.394   | 5.1                       | 5.4                           | –1.3          | 0.668   |
| SUD (for the SMI population), SMI (for the SUD population)         | 4.9                     | 5.3                         | –1.9          | 0.525   | 4.9                       | 5.2                           | –1.4          | 0.647   |
| Other medical information during 1-year clean period               |                         |                             |               |         |                           |                               |               |         |
| With at least 1 inpatient stay, %                                  | 6.1                     | 8.4                         | –9.7          | 0.004   | 6.7                       | 8.1                           | –5.8          | 0.089   |
| With at least 1 emergency department visit, %                      | 23.1                    | 27.4                        | –10.0         | 0.001   | 25.1                      | 26.9                          | –4.1          | 0.193   |
| Charlson Comorbidity Index                                         | 0.41                    | 0.48                        | –6.2          | 0.024   | 0.42                      | 0.47                          | –4.5          | 0.117   |
| Psychiatric Diagnosis Groups                                       | 0.56                    | 0.58                        | –2.2          | 0.442   | 0.56                      | 0.57                          | –1.5          | 0.608   |
| All health spending, \$ 2017                                       | \$9,574                 | \$10,356                    | –3.0          | 0.306   | \$9,416                   | \$10,255                      | –3.4          | 0.217   |

Abbreviations: CD/HD, consumer-driven/high-deductible; EPO, exclusive provider organization; HMO, health maintenance organization; POS, point of service; PPO, preferred provider organization; SMI, serious mental illness; Std. diff., standardized difference; SUD, substance use disorder.

Note: All spending was adjusted to 2017 levels using the Medical Care Consumer Price Index.

Source: Authors' analysis of data from the IBM MarketScan Commercial Database.

**TABLE A10. Adjusted health care costs for Medicaid enrollees with serious mental illness**

| Spending per person, \$     | Year 0     |              |          |        | Year 1     |              |          |        | Year 2     |              |          |        | Year 3     |              |          |        |
|-----------------------------|------------|--------------|----------|--------|------------|--------------|----------|--------|------------|--------------|----------|--------|------------|--------------|----------|--------|
|                             | All health | BH treatment | Other BH | Non-BH | All health | BH treatment | Other BH | Non-BH | All health | BH treatment | Other BH | Non-BH | All health | BH treatment | Other BH | Non-BH |
| <b>Engaged in treatment</b> |            |              |          |        |            |              |          |        |            |              |          |        |            |              |          |        |
| Total                       | 3,349      |              | 8        | 2,555  | 13,174     |              | 1,411    | 4,491  | 10,562     |              | 691      | 4,238  | 9,487      |              | 488      | 3,780  |
| Inpatient                   | 108        |              |          | 108    | 1,314      |              | 1,113    | 201    | 729        |              | 528      | 201    | 525        |              | 344      | 181    |
| Outpatient                  | 1,902      |              | 8        | 1,894  | 6,549      |              | 3,122    | 128    | 3,299      |              | 1,495    | 85     | 3,074      |              | 1,030    | 74     |
| ED                          | 552        |              |          | 552    | 1,161      |              |          | 170    | 991        |              |          | 79     | 963        |              |          | 69     |
| Pharmacy                    | 786        |              |          |        | 4,150      |              |          |        | 4,137      |              |          |        | 4,189      |              |          |        |
| <b>Not engaged</b>          |            |              |          |        |            |              |          |        |            |              |          |        |            |              |          |        |
| Total                       | 3,339      |              | 10       | 2,565  | 7,469      |              | 870      | 4,033  | 6,755      |              | 456      | 3,715  | 6,593      |              | 398      | 3,530  |
| Inpatient                   | 126        |              |          | 126    | 939        |              | 702      | 237    | 542        |              | 339      | 203    | 498        |              | 301      | 197    |
| Outpatient                  | 1,807      |              | 10       | 1,798  | 3,550      |              | 763      | 60     | 2,726      |              | 460      | 44     | 2,479      |              | 329      | 41     |
| ED                          | 641        |              |          | 641    | 1,178      |              |          | 108    | 1,070      |              |          | 72     | 1,033      |              |          | 56     |
| Pharmacy                    | 764        |              |          |        | 1,803      |              |          |        | 2,124      |              |          |        | 2,336      |              |          |        |
| <b>Offset</b>               |            |              |          |        |            |              |          |        |            |              |          |        |            |              |          |        |
| Total                       | 10         |              | -2       | -10    | 5,704*     |              | 541      | 459    | 3,807*     |              | 235      | 523    | 2,894*     |              | 90       | 250    |
| Inpatient                   | -18        |              |          | -18    | 375        |              | 411*     | -36*   | 186        |              | 188*     | -2     | 27         |              | 43*      | -16*   |
| Outpatient                  | 95         |              | -2*      | 97     | 2,999      |              | 2,358*   | 68*    | 573*       |              | 1,036*   | 40*    | 595*       |              | 701*     | 34*    |
| ED                          | -89        |              |          | -89*   | -17        |              | 62*      | -79*   | -63        |              |          | 7*     | -70*       |              | 13*      | -146*  |
| Pharmacy                    | 22         |              |          |        | 2,347*     |              |          |        | 2,012*     |              |          |        | 1,853*     |              |          |        |

Abbreviations: BH, behavioral health; ED, emergency department.

Note: All spending was adjusted to 2017 levels using the Medical Care Consumer Price Index. An \* indicates significance at the 0.05 level. For year 0, BH treatment is zero based on the clean period requirement. Year 1–year 3, BH treatment is required to occur in an outpatient setting, thus we did not provide a total. Pharmacy data are provided on a combined basis, not on a per treatment or setting level. Results are from a generalized boosted regression model adjusting for all variables in the matching tables and only included the propensity score matched sample. The offset is calculated as cost for engaged enrollees minus cost for nonengaged enrollees.

Source: Authors' analysis of data from the IBM MarketScan Multi-State Medicaid Database.



**TABLE A11. Adjusted health care costs for Medicaid enrollees with substance use disorder**

| Spending per person, \$     | Year 0     |              |          |        | Year 1     |              |          |        | Year 2     |              |          |        | Year 3     |              |          |        |
|-----------------------------|------------|--------------|----------|--------|------------|--------------|----------|--------|------------|--------------|----------|--------|------------|--------------|----------|--------|
|                             | All health | BH treatment | Other BH | Non-BH | All health | BH treatment | Other BH | Non-BH | All health | BH treatment | Other BH | Non-BH | All health | BH treatment | Other BH | Non-BH |
| <b>Engaged in treatment</b> |            |              |          |        |            |              |          |        |            |              |          |        |            |              |          |        |
| Total                       | 6,184      |              | 19       | 3,724  | 16,855     |              | 809      | 5,776  | 11,494     |              | 396      | 5,093  | 10,460     |              | 269      | 4,827  |
| Inpatient                   | 356        |              |          | 356    | 809        |              | 178      | 630    | 547        |              | 44       | 503    | 511        |              | 36       | 475    |
| Outpatient                  | 2,697      |              | 19       | 2,679  | 10,274     | 5,660        | 573      | 4,041  | 5,019      | 1,096        | 290      | 3,633  | 4,107      | 479          | 209      | 3,419  |
| ED                          | 689        |              |          | 689    | 1,162      |              | 58       | 1,104  | 1,020      |              | 62       | 958    | 957        |              | 25       | 933    |
| Pharmacy                    | 2,441      |              |          |        | 4,610      |              |          |        | 4,909      |              |          |        | 4,884      |              |          |        |
| <b>Not engaged</b>          |            |              |          |        |            |              |          |        |            |              |          |        |            |              |          |        |
| Total                       | 7,121      |              | 13       | 4,152  | 12,350     |              | 983      | 6,348  | 10,504     |              | 370      | 5,583  | 10,292     |              | 259      | 5,305  |
| Inpatient                   | 420        |              |          | 420    | 1,465      |              | 595      | 870    | 952        |              | 187      | 766    | 860        |              | 136      | 724    |
| Outpatient                  | 2,850      |              | 13       | 2,836  | 5,351      | 1,334        | 189      | 3,828  | 3,850      | 425          | 94       | 3,331  | 3,444      | 250          | 79       | 3,115  |
| ED                          | 896        |              |          | 896    | 1,849      |              | 199      | 1,650  | 1,575      |              | 89       | 1,486  | 1,510      |              | 44       | 1,466  |
| Pharmacy                    | 2,955      |              |          |        | 3,685      |              |          |        | 4,127      |              |          |        | 4,478      |              |          |        |
| <b>Offset</b>               |            |              |          |        |            |              |          |        |            |              |          |        |            |              |          |        |
| Total                       | -937       |              | 5        | -429   | 4,504      |              | -174     | -573   | 990        |              | 26       | -489   | 167        |              | 10       | -478   |
| Inpatient                   | -64        |              |          | -64    | -657       |              | -417*    | -240*  | -405       |              | -143*    | -262*  | -349       |              | -100*    | -249*  |
| Outpatient                  | -152       |              | 5*       | -158   | 4,923      | 4,326*       | 384*     | 213    | 1,169      | 671*         | 197*     | 301    | 663        | 229*         | 130*     | 304    |
| ED                          | -207       |              |          | -207*  | -687       |              | -141*    | -546*  | -556       |              | -27*     | -528*  | -553       |              | -19*     | -533*  |
| Pharmacy                    | -514       |              |          |        | 924*       |              |          |        | 782*       |              |          |        | 406        |              |          |        |

Abbreviations: BH, behavioral health; ED, emergency department.

Note: All spending was adjusted to 2017 levels using the Medical Care Consumer Price Index. An \* indicates significance at the 0.05 level. For year 0, behavioral health treatment is zero based on the clean period requirement. Year 1–year 3, behavioral health treatment is required to occur in an outpatient setting, thus we did not provide a total. Pharmacy data are provided on a combined basis, not on a per treatment or setting level. Results are from a generalized boosted regression model adjusting for all variables in the matching tables and only included the propensity score matched sample. The offset is calculated as cost for engaged enrollees minus cost for nonengaged enrollees.

Source: Authors' analysis of data from the IBM MarketScan Multi-State Medicaid Database.

**TABLE A12. Adjusted health care costs for commercial enrollees with serious mental illness**

| Spending per person, \$     | Year 0     |              |          |        | Year 1     |              |          |        | Year 2     |              |          |        | Year 3     |              |          |        |
|-----------------------------|------------|--------------|----------|--------|------------|--------------|----------|--------|------------|--------------|----------|--------|------------|--------------|----------|--------|
|                             | All health | BH treatment | Other BH | Non-BH | All health | BH treatment | Other BH | Non-BH | All health | BH treatment | Other BH | Non-BH | All health | BH treatment | Other BH | Non-BH |
| <b>Engaged in treatment</b> |            |              |          |        |            |              |          |        |            |              |          |        |            |              |          |        |
| Total                       | 3,449      |              | 3        | 2,770  | 9,312      |              | 886      | 4,213  | 6,889      |              | 315      | 3,656  | 6,703      |              | 264      | 3,637  |
| Inpatient                   | 22         |              |          | 22     | 709        |              | 673      | 35     | 258        |              | 234      | 23     | 208        |              | 184      | 23     |
| Outpatient                  | 2,151      |              | 3        | 2,149  | 4,812      | 1,753        | 49       | 3,009  | 3,249      | 682          | 21       | 2,546  | 2,990      | 466          | 20       | 2,503  |
| ED                          | 600        |              |          | 600    | 1,331      |              | 163      | 1,168  | 1,146      |              | 60       | 1,086  | 1,169      |              | 59       | 1,110  |
| Pharmacy                    | 676        |              |          |        | 2,460      |              |          |        | 2,237      |              |          |        | 2,336      |              |          |        |
| <b>Not engaged</b>          |            |              |          |        |            |              |          |        |            |              |          |        |            |              |          |        |
| Total                       | 3,412      |              | 2        | 2,808  | 5,935      |              | 405      | 3,881  | 5,258      |              | 182      | 3,566  | 5,643      |              | 169      | 3,612  |
| Inpatient                   | 24         |              |          | 24     | 341        |              | 312      | 30     | 158        |              | 133      | 25     | 145        |              | 122      | 23     |
| Outpatient                  | 2,123      |              | 2        | 2,121  | 3,167      | 570          | 19       | 2,578  | 2,463      | 171          | 9        | 2,282  | 2,402      | 148          | 9        | 2,245  |
| ED                          | 663        |              |          | 663    | 1,348      |              | 74       | 1,274  | 1,298      |              | 39       | 1,258  | 1,382      |              | 38       | 1,343  |
| Pharmacy                    | 603        |              |          |        | 1,079      |              |          |        | 1,340      |              |          |        | 1,714      |              |          |        |
| <b>Offset</b>               |            |              |          |        |            |              |          |        |            |              |          |        |            |              |          |        |
| Total                       | 36         |              | 1        | -37    | 3,377      |              | 481      | 332    | 1,631      |              | 133      | 90     | 1,060      |              | 94       | 25     |
| Inpatient                   | -2         |              |          | -2*    | 367        |              | 362*     | 5*     | 100        |              | 101*     | -2*    | 63         |              | 63*      | 0      |
| Outpatient                  | 28         |              | 1*       | 28     | 1,645      | 1,183*       | 30*      | 432    | 786        | 511*         | 12*      | 263    | 588        | 319*         | 11*      | 258    |
| ED                          | -63        |              |          | -63*   | -17        |              | 89*      | -106   | -152       |              | 20*      | -172   | -213       |              | 21*      | -234   |
| Pharmacy                    | 73*        |              |          |        | 1,381*     |              |          |        | 897*       |              |          |        | 622*       |              |          |        |

Abbreviations: BH, behavioral health; ED, emergency department.

Note: All spending was adjusted to 2017 levels using the Medical Care Consumer Price Index. An \* indicates significance at the 0.05 level. For year 0, BH treatment is zero based on the clean period requirement. Year 1–year 3, BH treatment is required to occur in an outpatient setting, thus we did not provide a total. Pharmacy data are provided on a combined basis, not on a per treatment or setting level. Results are from a generalized boosted regression model adjusting for all variables in the matching tables and only included the propensity score matched sample. The offset is calculated as cost for engaged enrollees minus cost for nonengaged enrollees.

Source: Authors' analysis of data from the IBM MarketScan Commercial Database.

**TABLE A13. Adjusted health care costs for commercial enrollees with substance use disorder**

| Spending per person, \$     | Year 0     |              |          |        | Year 1     |              |          |        | Year 2     |              |          |        | Year 3     |              |          |        |
|-----------------------------|------------|--------------|----------|--------|------------|--------------|----------|--------|------------|--------------|----------|--------|------------|--------------|----------|--------|
|                             | All health | BH treatment | Other BH | Non-BH | All health | BH treatment | Other BH | Non-BH | All health | BH treatment | Other BH | Non-BH | All health | BH treatment | Other BH | Non-BH |
| <b>Engaged in treatment</b> |            |              |          |        |            |              |          |        |            |              |          |        |            |              |          |        |
| Total                       | 3,964      |              | 17       | 2,838  | 13,605     |              | 2,550    | 3,888  | 8,205      |              | 1,058    | 3,522  | 7,662      |              | 879      | 3,562  |
| Inpatient                   | 381        |              |          | 381    | 2,393      |              | 1,771    | 622    | 1,194      |              | 678      | 516    | 1,119      |              | 597      | 521    |
| Outpatient                  | 1,915      |              | 17       | 1,898  | 7,635      | 4,565        | 553      | 2,517  | 3,848      | 1,303        | 270      | 2,275  | 3,341      | 896          | 203      | 2,242  |
| ED                          | 559        |              |          | 559    | 975        |              | 226      | 749    | 841        |              | 110      | 731    | 877        |              | 79       | 798    |
| Pharmacy                    | 1,109      |              |          |        | 2,601      |              |          |        | 2,322      |              |          |        | 2,326      |              |          |        |
| <b>Not engaged</b>          |            |              |          |        |            |              |          |        |            |              |          |        |            |              |          |        |
| Total                       | 4,288      |              | 26       | 3,042  | 9,554      |              | 1,833    | 4,116  | 7,004      |              | 861      | 3,787  | 7,224      |              | 789      | 3,882  |
| Inpatient                   | 433        |              |          | 433    | 2,066      |              | 1,339    | 728    | 1,272      |              | 629      | 643    | 1,238      |              | 570      | 668    |
| Outpatient                  | 1,986      |              | 26       | 1,960  | 4,658      | 1,998        | 240      | 2,420  | 2,933      | 587          | 126      | 2,220  | 2,907      | 567          | 124      | 2,216  |
| ED                          | 650        |              |          | 650    | 1,223      |              | 255      | 969    | 1,030      |              | 106      | 924    | 1,094      |              | 96       | 998    |
| Pharmacy                    | 1,219      |              |          |        | 1,607      |              |          |        | 1,769      |              |          |        | 1,986      |              |          |        |
| <b>Offset</b>               |            |              |          |        |            |              |          |        |            |              |          |        |            |              |          |        |
| Total                       | -324       |              | -9       | -205   | 4,051      |              | 717      | -228   | 1,204      |              | 197      | -265   | 438        |              | 89       | -321   |
| Inpatient                   | -52        |              |          | -52*   | 327        |              | 433*     | -106*  | -77        |              | 50*      | -127*  | -119       |              | 28*      | -147*  |
| Outpatient                  | -70        |              | -9*      | -62    | 2,978      | 2,568*       | 313*     | 98     | 915        | 716*         | 144*     | 55     | 434        | 329*         | 79*      | 26     |
| ED                          | -91        |              |          | -91*   | -248       |              | -29*     | -220*  | -190       |              | 3*       | -193*  | -217       |              | -17*     | -200*  |
| Pharmacy                    | -110       |              |          |        | 994*       |              |          |        | 552*       |              |          |        | 340*       |              |          |        |

Abbreviations: BH, behavioral health; ED, emergency department.

Note: All spending was adjusted to 2017 levels using the Medical Care Consumer Price Index. An \* indicates significance at the 0.05 level. For year 0, BH treatment is zero based on the clean period requirement. Year 1–year 3, BH treatment is required to occur in an outpatient setting, thus we did not provide a total. Pharmacy data are provided on a combined basis, not on a per treatment or setting level. Results are from a generalized boosted regression model adjusting for all variables in the matching tables and only included the propensity score matched sample. The offset is calculated as cost for engaged enrollees minus cost for nonengaged enrollees.

Source: Authors' analysis of data from the IBM MarketScan Commercial Database.

**TABLE A14. Adjusted total health care costs for Medicaid enrollee, subpopulation with opioid use disorder**

| Spending per person, \$         | Year 0     | Year 1     | Year 2     | Year 3     |
|---------------------------------|------------|------------|------------|------------|
|                                 | All health | All health | All health | All health |
| <b>Engaged in treatment</b>     |            |            |            |            |
| Total                           | 6,472      | 19,629     | 15,708     | 15,953     |
| <b>Not engaged in treatment</b> |            |            |            |            |
| Total                           | 8,187      | 14,540     | 12,657     | 13,205     |
| <b>Offset</b>                   |            |            |            |            |
| Total                           | -1,715*    | 5,088*     | 3,051*     | 2,749*     |

Note: All spending was adjusted to 2017 levels using the Medical Care Consumer Price Index. An \* indicates significance at the 0.05 level. For year 0, behavioral health treatment is zero based on the clean period requirement. Results are from a generalized boosted regression model adjusting for all variables in the matching tables and only included the propensity score matched sample. The offset is calculated as cost for engaged enrollees minus cost for nonengaged enrollees.

Source: Authors' analysis of data from the IBM MarketScan Multi-State Medicaid Database.

**TABLE A15. Adjusted health care costs for commercial enrollees, subpopulation with opioid use disorder**

| Spending per person, \$     | Year 0     |              |          |        | Year 1     |              |          |        | Year 2     |              |          |        | Year 3     |              |          |        |
|-----------------------------|------------|--------------|----------|--------|------------|--------------|----------|--------|------------|--------------|----------|--------|------------|--------------|----------|--------|
|                             | All health | BH treatment | Other BH | Non-BH | All health | BH treatment | Other BH | Non-BH | All health | BH treatment | Other BH | Non-BH | All health | BH treatment | Other BH | Non-BH |
| <b>Engaged in treatment</b> |            |              |          |        |            |              |          |        |            |              |          |        |            |              |          |        |
| Total                       | 5,065      |              | 22       | 3,924  | 18,641     |              | 3,587    | 4,947  | 13,669     |              | 2,253    | 4,862  | 11,999     |              | 1,867    | 4,983  |
| Inpatient                   | 1,003      |              |          | 1,003  | 3,585      |              | 2,530    | 1,054  | 2,639      |              | 1,554    | 1,086  | 2,509      |              | 1,293    | 1,216  |
| Outpatient                  | 2,164      |              | 22       | 2,142  | 9,922      | 6,080        | 860      | 2,982  | 6,157      | 2,782        | 576      | 2,799  | 5,206      | 2,000        | 452      | 2,754  |
| ED                          | 779        |              |          | 779    | 1,107      |              | 197      | 910    | 1,100      |              | 123      | 977    | 1,134      |              | 122      | 1,013  |
| Pharmacy                    | 1,119      |              |          |        | 4,028      |              |          |        | 3,772      |              |          |        | 3,149      |              |          |        |
| <b>Not engaged</b>          |            |              |          |        |            |              |          |        |            |              |          |        |            |              |          |        |
| Total                       | 5,797      |              | 30       | 4,280  | 14,115     |              | 3,113    | 5,654  | 11,410     |              | 2,033    | 5,494  | 12,353     |              | 1,999    | 5,756  |
| Inpatient                   | 1,143      |              |          | 1,143  | 3,826      |              | 2,441    | 1,385  | 3,056      |              | 1,605    | 1,451  | 3,155      |              | 1,553    | 1,602  |
| Outpatient                  | 2,338      |              | 30       | 2,308  | 6,737      | 3,280        | 441      | 3,017  | 4,707      | 1,554        | 313      | 2,840  | 4,788      | 1,583        | 317      | 2,888  |
| ED                          | 829        |              |          | 829    | 1,484      |              | 231      | 1,253  | 1,319      |              | 115      | 1,204  | 1,395      |              | 129      | 1,266  |
| Pharmacy                    | 1,487      |              |          |        | 2,068      |              |          |        | 2,328      |              |          |        | 3,015      |              |          |        |
| <b>Offset</b>               |            |              |          |        |            |              |          |        |            |              |          |        |            |              |          |        |
| Total                       | -732       |              | -8       | -356   | 4,526*     |              | 474      | -708   | 2,259*     |              | 220      | -633   | -354       |              | -132     | -773   |
| Inpatient                   | -140       |              |          | -140   | -241       |              | 89       | -331*  | -416       |              | -51      | -365*  | -646       |              | -260*    | -386*  |
| Outpatient                  | -173       |              | -8       | -165   | 3,185      | 2,800*       | 419*     | -34    | 1,450      | 1,228*       | 264*     | -41    | 418        | 416*         | 135*     | -134   |
| ED                          | -50        |              |          | -50    | -377       |              | -34*     | -343*  | -219       |              | 8*       | -227*  | -260       |              | -7*      | -253*  |
| Pharmacy                    | -368       |              |          |        | 1,960*     |              |          |        | 1,444*     |              |          |        | 134        |              |          |        |

Abbreviations: BH, behavioral health; ED, emergency department.

Note: All spending was adjusted to 2017 levels using the Medical Care Consumer Price Index. An \* indicates significance at the 0.05 level. For year 0, BH treatment is zero based on the clean period requirement. Year 1–year 3, BH treatment is required to occur in an outpatient setting, thus we did not provide a total. Pharmacy data are provided on a combined basis, not on a per treatment or setting level. Results are from a generalized boosted regression model adjusting for all variables in the matching tables and only included the propensity score matched sample. The offset is calculated as cost for engaged enrollees minus cost for nonengaged enrollees.

Source: Authors' analysis of data from the IBM MarketScan Commercial Database.

**TABLE A16. Adjusted total health care costs for Medicaid enrollees, subpopulation adults 44 – 64 years with a substance use disorder**

| Spending per person, \$         | Year 0     | Year 1     | Year 2     | Year 3     |
|---------------------------------|------------|------------|------------|------------|
|                                 | All Health | All Health | All Health | All Health |
| <b>Engaged in treatment</b>     |            |            |            |            |
| Total                           | 7,294      | 14,635     | 11,050     | 12,164     |
| <b>Not engaged in treatment</b> |            |            |            |            |
| Total                           | 7,416      | 14,507     | 14,522     | 14,075     |
| <b>Offset</b>                   |            |            |            |            |
| Total                           | -122       | 128        | -3,473*    | -1,911     |

Note: All spending was adjusted to 2017 levels using the Medical Care Consumer Price Index. An \* indicates significance at the 0.05 level. For year 0, behavioral health treatment is zero based on the clean period requirement. Results are from a generalized boosted regression model adjusting for all variables in the matching tables and only included the propensity score matched sample. The offset is calculated as cost for engaged enrollees minus cost for nonengaged enrollees.

Source: Authors' analysis of data from the IBM MarketScan Multi-State Medicaid Database.

**TABLE A17. Adjusted health care costs for commercial enrollees, subpopulation adults 44 – 64 years with a substance use disorder**

| Spending per person, \$     | Year 0     |              |          |        | Year 1     |              |          |        | Year 2     |              |          |        | Year 3     |              |          |        |
|-----------------------------|------------|--------------|----------|--------|------------|--------------|----------|--------|------------|--------------|----------|--------|------------|--------------|----------|--------|
|                             | All health | BH treatment | Other BH | Non-BH | All health | BH treatment | Other BH | Non-BH | All health | BH treatment | Other BH | Non-BH | All health | BH treatment | Other BH | Non-BH |
| <b>Engaged in treatment</b> |            |              |          |        |            |              |          |        |            |              |          |        |            |              |          |        |
| Total                       | 5,637      |              | 14       | 3,571  | 13,808     | 3,435        | 1,922    | 4,911  | 9,351      | 866          | 635      | 4,638  | 9,182      | 559          | 490      | 4,723  |
| Inpatient                   | 244        |              |          | 244    | 1,632      |              | 1,239    | 393    | 653        |              | 346      | 307    | 638        |              | 295      | 344    |
| Outpatient                  | 2,793      |              | 14       | 2,779  | 7,578      | 3,435        | 423      | 3,720  | 4,594      | 866          | 186      | 3,542  | 4,331      | 559          | 132      | 3,640  |
| ED                          | 547        |              |          | 547    | 1,058      |              | 260      | 799    | 893        |              | 103      | 789    | 802        |              | 63       | 739    |
| Pharmacy                    | 2,052      |              |          |        | 3,539      |              |          |        | 3,212      |              |          |        | 3,410      |              |          |        |
| <b>Not engaged</b>          |            |              |          |        |            |              |          |        |            |              |          |        |            |              |          |        |
| Total                       | 6,185      |              | 22       | 3,821  | 11,481     | 1,532        | 1,662    | 5,367  | 9,120      | 289          | 619      | 4,956  | 9,661      | 263          | 514      | 5,180  |
| Inpatient                   | 310        |              |          | 310    | 1,675      |              | 1,196    | 479    | 826        |              | 409      | 418    | 792        |              | 325      | 467    |
| Outpatient                  | 2,854      |              | 22       | 2,832  | 5,620      | 1,532        | 200      | 3,887  | 3,975      | 289          | 89       | 3,597  | 4,012      | 263          | 82       | 3,667  |
| ED                          | 679        |              |          | 679    | 1,267      |              | 266      | 1,001  | 1,063      |              | 122      | 941    | 1,152      |              | 107      | 1,045  |
| Pharmacy                    | 2,342      |              |          |        | 2,919      |              |          |        | 3,256      |              |          |        | 3,704      |              |          |        |
| <b>Offset</b>               |            |              |          |        |            |              |          |        |            |              |          |        |            |              |          |        |
| Total                       | -548       |              | -8       | -250   | 2,327      | 1,903        | 260      | -456   | 231        | 578          | 16       | -318   | -479       | 297          | -25      | -457   |
| Inpatient                   | -66        |              |          | -66    | -43        |              | 44*      | -86*   | -174       |              | -63*     | -111*  | -154       |              | -30*     | -124*  |
| Outpatient                  | -61        |              | -8       | -53    | 1,959      | 1,903*       | 223*     | -168   | 620        | 578*         | 97*      | -56    | 319        | 297*         | 49*      | -27    |
| ED                          | -131       |              |          | -131   | -209       |              | -7*      | -202*  | -170       |              | -18*     | -152*  | -350       |              | -44*     | -306*  |
| Pharmacy                    | -290       |              |          |        | 620*       |              |          |        | -45        |              |          |        | -294*      |              |          |        |

Abbreviations: BH, behavioral health; ED, emergency department.

Note: All spending was adjusted to 2017 levels using the Medical Care Consumer Price Index. An \* indicates significance at the 0.05 level. For year 0, BH Treatment is zero based on the clean period requirement. Year 1–year 3, BH treatment is required to occur in an outpatient setting, thus we did not provide a total. Pharmacy data are provided on a combined basis, not on a per treatment or setting level. Results are from a generalized boosted regression model adjusting for all variables in the matching tables and only included the propensity score matched sample. The offset is calculated as cost for engaged enrollees minus cost for nonengaged enrollees.

Source: Authors' analysis of data from the IBM MarketScan Commercial Database.

**TABLE A18. Treatments and Encounter definitions, when combined with a serious mental illness or substance use disorder diagnosis**

| Code system      | Code  | Code system | Code  | Code system | Code  | Code system | Code  | Code system | Code    |
|------------------|-------|-------------|-------|-------------|-------|-------------|-------|-------------|---------|
| <b>Treatment</b> |       |             |       |             |       |             |       |             |         |
| CPT              | 99484 | CPT         | 90865 | CPT         | 99241 | CPT         | S5101 | HCPCS       | H2020   |
| CPT              | 99492 | CPT         | 90867 | CPT         | 99242 | CPT         | S5110 | HCPCS       | H2032   |
| CPT              | 99493 | CPT         | 90868 | CPT         | 99243 | CPT         | S9123 | HCPCS       | H2035   |
| CPT              | 99494 | CPT         | 90869 | CPT         | 99244 | CPT         | S9127 | HCPCS       | H2036   |
| CPT              | 1182F | CPT         | 90870 | CPT         | 99245 | CPT         | T1001 | HCPCS       | S0201   |
| CPT              | 3090F | CPT         | 90871 | CPT         | 99251 | CPT         | T1007 | HCPCS       | S9475   |
| CPT              | 3091F | CPT         | 90875 | CPT         | 99252 | CPT         | T1011 | HCPCS       | S9480   |
| CPT              | 3700F | CPT         | 90876 | CPT         | 99253 | CPT         | T1017 | HCPCS       | T1006   |
| CPT              | 4060F | CPT         | 90880 | CPT         | 99254 | CPT         | T1019 | HCPCS       | T1012   |
| CPT              | 4065F | CPT         | 90882 | CPT         | 99255 | CPT         | T1021 | HCPCS       | T1015   |
| CPT              | 4320F | CPT         | 90899 | CPT         | 99341 | CPT         | T1040 | HCPCS       | T2048   |
| CPT              | 90785 | CPT         | 90901 | CPT         | 99342 | CPT         | T2022 | ICD10PCS    | HZ2ZZZZ |
| CPT              | 90791 | CPT         | 90906 | CPT         | 99343 | CPT         | T2033 | ICD9PCS     | 94.62   |
| CPT              | 90792 | CPT         | 90908 | CPT         | 99344 | HCPCS       | G0155 | ICD9PCS     | 94.65   |
| CPT              | 90801 | CPT         | 90911 | CPT         | 99345 | HCPCS       | G0176 | ICD9PCS     | 94.68   |
| CPT              | 90802 | CPT         | 9462  | CPT         | 99347 | HCPCS       | G0177 | Rev Code    | 0909    |
| CPT              | 90804 | CPT         | 96100 | CPT         | 99348 | HCPCS       | G0396 | Rev Code    | 0910    |
| CPT              | 90805 | CPT         | 96101 | CPT         | 99349 | HCPCS       | G0397 | Rev Code    | 0918    |
| CPT              | 90806 | CPT         | 96102 | CPT         | 99350 | HCPCS       | G0409 | Rev Code    | 1001    |
| CPT              | 90807 | CPT         | 96103 | CPT         | 99354 | HCPCS       | G0410 | Rev Code    | 1002    |
| CPT              | 90808 | CPT         | 96116 | CPT         | 99355 | HCPCS       | G0411 | Rev Code    | 0116    |
| CPT              | 90809 | CPT         | 96117 | CPT         | 99383 | HCPCS       | G0443 | Rev Code    | 0126    |
| CPT              | 90810 | CPT         | 96118 | CPT         | 99384 | HCPCS       | G0463 | Rev Code    | 0136    |
| CPT              | 90811 | CPT         | 96119 | CPT         | 99385 | HCPCS       | H0001 | Rev Code    | 0146    |
| CPT              | 90812 | CPT         | 96120 | CPT         | 99386 | HCPCS       | H0002 | Rev Code    | 0156    |
| CPT              | 90813 | CPT         | 96125 | CPT         | 99387 | HCPCS       | H0004 | Rev Code    | 0510    |
| CPT              | 90814 | CPT         | 96127 | CPT         | 99393 | HCPCS       | H0005 | Rev Code    | 0513    |
| CPT              | 90815 | CPT         | 96150 | CPT         | 99394 | HCPCS       | H0008 | Rev Code    | 0515    |
| CPT              | 90816 | CPT         | 96151 | CPT         | 99395 | HCPCS       | H0009 | Rev Code    | 0517    |
| CPT              | 90817 | CPT         | 96152 | CPT         | 99396 | HCPCS       | H0010 | Rev Code    | 0519    |
| CPT              | 90818 | CPT         | 96153 | CPT         | 99397 | HCPCS       | H0011 | Rev Code    | 0520    |
| CPT              | 90819 | CPT         | 96154 | CPT         | 99401 | HCPCS       | H0012 | Rev Code    | 0521    |
| CPT              | 90821 | CPT         | 96155 | CPT         | 99402 | HCPCS       | H0013 | Rev Code    | 0522    |
| CPT              | 90822 | CPT         | 97537 | CPT         | 99403 | HCPCS       | H0014 | Rev Code    | 0523    |
| CPT              | 90823 | CPT         | 98960 | CPT         | 99404 | HCPCS       | H0015 | Rev Code    | 0527    |
| CPT              | 90824 | CPT         | 98961 | CPT         | 99408 | HCPCS       | H0016 | Rev Code    | 0528    |
| CPT              | 90826 | CPT         | 98962 | CPT         | 99409 | HCPCS       | H0017 | Rev Code    | 0529    |
| CPT              | 90827 | CPT         | 99078 | CPT         | 99411 | HCPCS       | H0018 | Rev Code    | 0900    |
| CPT              | 90828 | CPT         | 99201 | CPT         | 99412 | HCPCS       | H0019 | Rev Code    | 0901    |
| CPT              | 90829 | CPT         | 99202 | CPT         | 99509 | HCPCS       | H0022 | Rev Code    | 0902    |
| CPT              | 90830 | CPT         | 99203 | CPT         | 99510 | HCPCS       | H0031 | Rev Code    | 0903    |
| CPT              | 90832 | CPT         | 99204 | CPT         | G0116 | HCPCS       | H0035 | Rev Code    | 0904    |
| CPT              | 90833 | CPT         | 99205 | CPT         | G0129 | HCPCS       | H0036 | Rev Code    | 0905    |
| CPT              | 90834 | CPT         | 99211 | CPT         | G0300 | HCPCS       | H0037 | Rev Code    | 0906    |



| <b>Code system</b> | <b>Code</b> |
|--------------------|-------------|--------------------|-------------|--------------------|-------------|--------------------|-------------|--------------------|-------------|
| CPT                | 90835       | CPT                | 99212       | CPT                | G0502       | HCPCS              | H0038       | Rev Code           | 0907        |
| CPT                | 90836       | CPT                | 99213       | CPT                | G0503       | HCPCS              | H0039       | Rev Code           | 0911        |
| CPT                | 90837       | CPT                | 99214       | CPT                | G0504       | HCPCS              | H0040       | Rev Code           | 0912        |
| CPT                | 90838       | CPT                | 99215       | CPT                | G0505       | HCPCS              | H0046       | Rev Code           | 0913        |
| CPT                | 90841       | CPT                | 99217       | CPT                | G0506       | HCPCS              | H0047       | Rev Code           | 0914        |
| CPT                | 90842       | CPT                | 99218       | CPT                | G0507       | HCPCS              | H0050       | Rev Code           | 0915        |
| CPT                | 90843       | CPT                | 99219       | CPT                | g0716       | HCPCS              | H2000       | Rev Code           | 0916        |
| CPT                | 90844       | CPT                | 99220       | CPT                | G8947       | HCPCS              | H2001       | Rev Code           | 0917        |
| CPT                | 90845       | CPT                | 99221       | CPT                | H0006       | HCPCS              | H2012       | Rev Code           | 0919        |
| CPT                | 90846       | CPT                | 99222       | CPT                | H0023       | HCPCS              | H2013       | Rev Code           | 0944        |
| CPT                | 90847       | CPT                | 99223       | CPT                | H0025       | HCPCS              | H2014       | Rev Code           | 0945        |
| CPT                | 90849       | CPT                | 99231       | CPT                | H0026       | HCPCS              | H2015       | Rev Code           | 0982        |
| CPT                | 90853       | CPT                | 99232       | CPT                | H0029       | HCPCS              | H2016       | Rev Code           | 0983        |
| CPT                | 90855       | CPT                | 99233       | CPT                | H0032       | HCPCS              | H2017       |                    |             |
| CPT                | 90857       | CPT                | 99238       | CPT                | H2021       | HCPCS              | H2018       |                    |             |
| CPT                | 90862       | CPT                | 99239       | CPT                | H2027       | HCPCS              | H2019       |                    |             |
| <b>Encounters</b>  |             |                    |             |                    |             |                    |             |                    |             |
| CPT                | 90839       | CPT                | 99291       | CPT                | H0020       | HCPCS              | H2010       | HCPCS              | S9485       |
| CPT                | 90840       | CPT                | 99605       | CPT                | S9482       | HCPCS              | H2011       | Rev Code           | 0516        |
| CPT                | 90863       | CPT                | 99606       | HCPCS              | H0007       | HCPCS              | M0064       | Rev Code           | 0526        |
| CPT                | 99283       | CPT                | G9369       | HCPCS              | H0034       | HCPCS              | S9484       |                    |             |

Abbreviations: CPT, Current Procedural Terminology; HCPCS, Healthcare Common Procedure Coding System.

## REFERENCES

---

1. Hunter SB, Ramchand R, Griffin BA, et al: The effectiveness of community-based delivery of an evidence-based treatment for adolescent substance use. *J Subst Abuse Treat* 2012; 43:211–220.
2. Ramchand R, Griffin BA, Suttorp M, et al: Using a cross-study design to assess the efficacy of Motivational Enhancement Therapy–Cognitive Behavioral Therapy 5 (MET/CBT5) in treating adolescents with cannabis-related disorders. *J Stud Alcohol Drugs* 2011; 72:380–389.
3. Schuler M S, Griffin BA, Ramchand R, et al: Effectiveness of treatment for adolescent substance use: is biological drug testing sufficient? *J Stud Alcohol Drugs* 2014; 75:358–370.
4. Kang JDY, Schafer J L: Demystifying double robustness: a comparison of alternative strategies for estimating a population mean from incomplete data. *Stat Sci* 2007; 22:523–539.
